# Supplementary material
Source: MDPI journal article supplement (https://www.mdpi.com/2075-163X/12/12/1541)
Supplement: s1 [file s1 › minerals-1997810-SI.pdf]

## Supplementary Materials

# On the Sorption Mode of U(IV) at Calcium Silicate Hydrate: A Comparison of Adsorption, Absorption in the Interlayer, and Incorporation by Means of Density Functional Calculations

Ion Chiorescu, Alena Kremleva and Sven Krüger \*

Theoretische Chemie, Technische Universität München, 85747 Garching, Germany

\* Correspondence: [krueger@ch.tum.de](mailto:krueger@ch.tum.de)

Figures showing all sorption complexes of U(IV) in CSH according to Table 1 of the main text. For the labeling of sites see section Sorption Sites of the main text.

Surface:

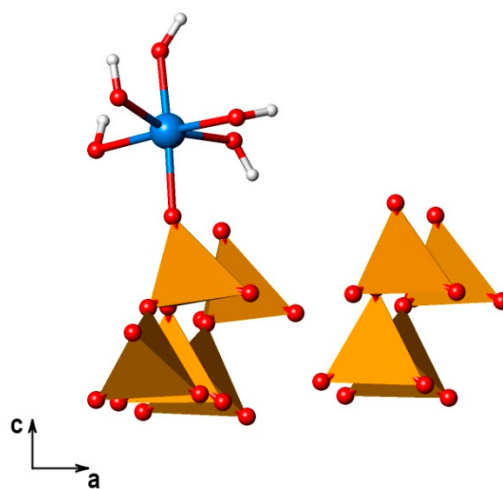

Figure S1. SiO.

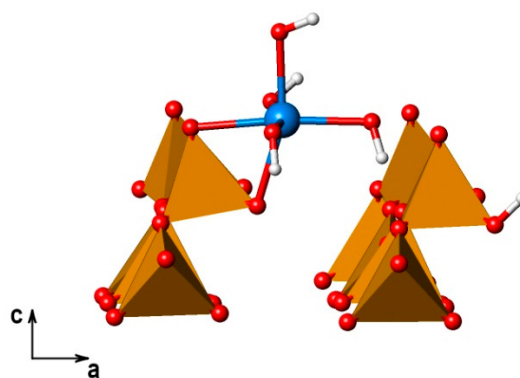

Figure S2. SiOO.

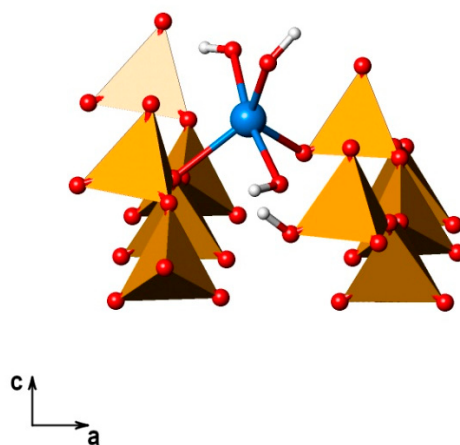

Figure S3. Chbr2.

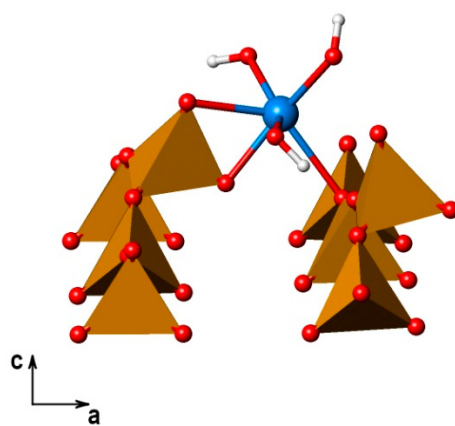

Figure S4. Chbr3.

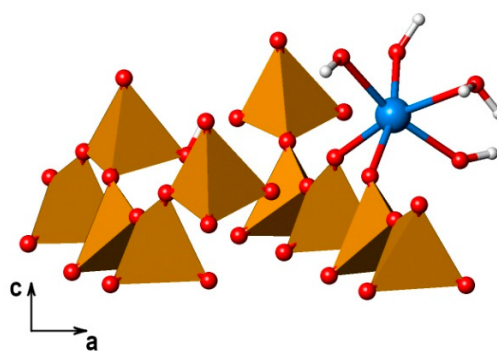

Figure S5. Def2.

Interlayer:

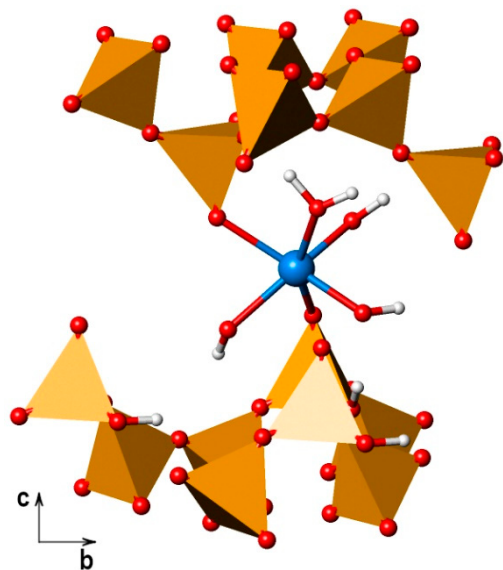

Figure S6. Lbr2.

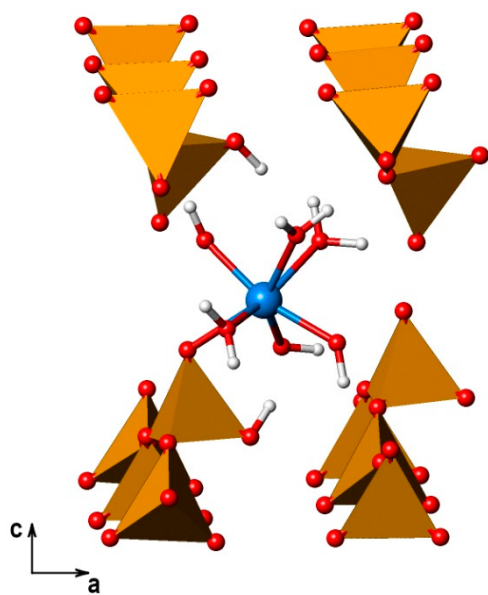

Figure S7. SiO.

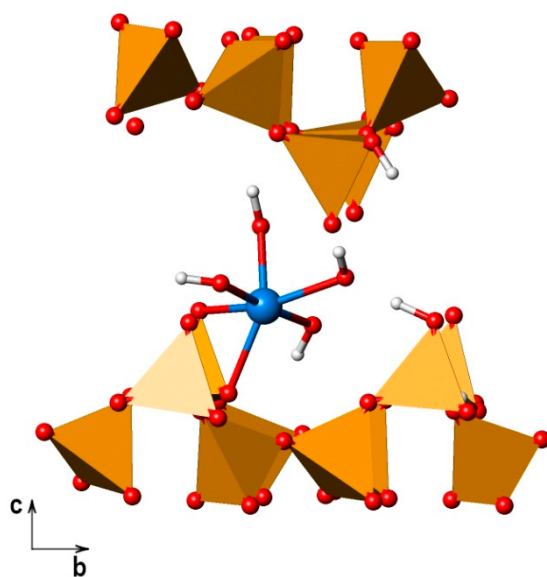

Figure S8. SiOO.

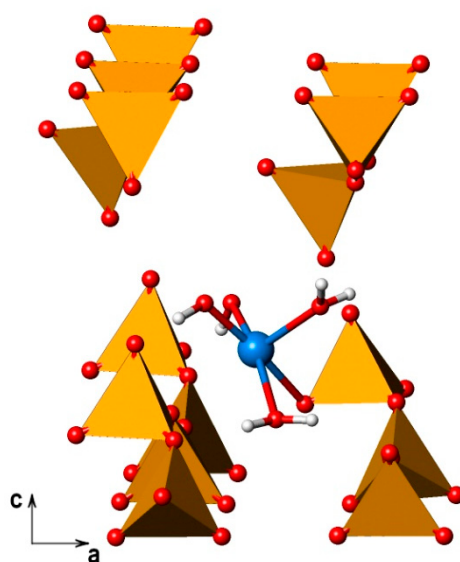

Figure S9. Chbr1.

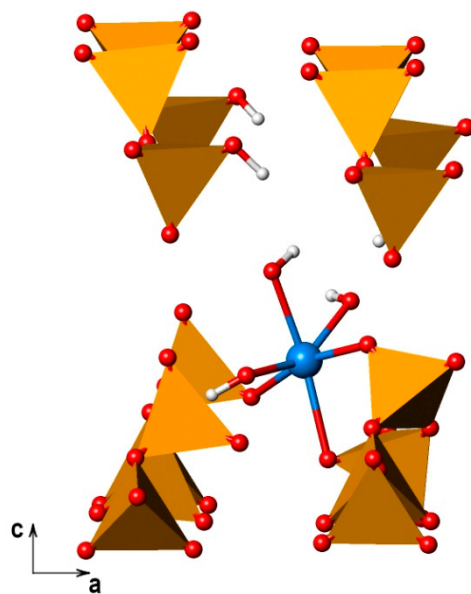

Figure S10. Chbr3.

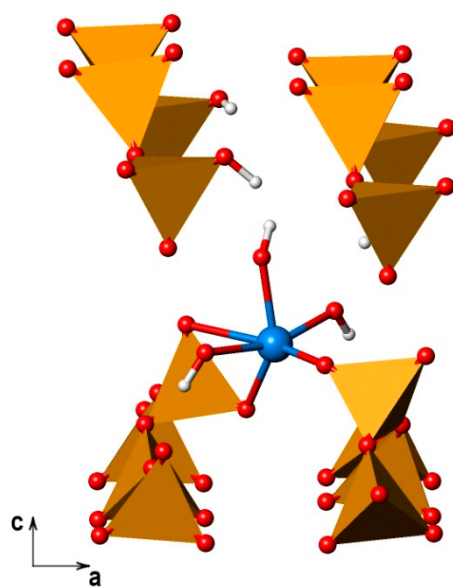

Figure S11. Chbr3'.

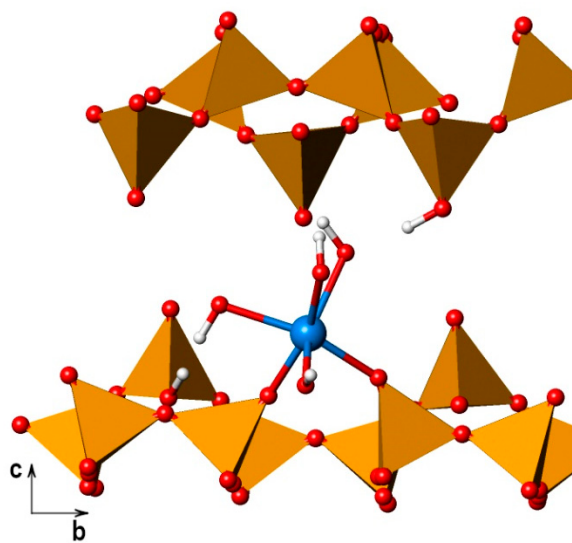

Figure S12. Def2.

CaO layer:

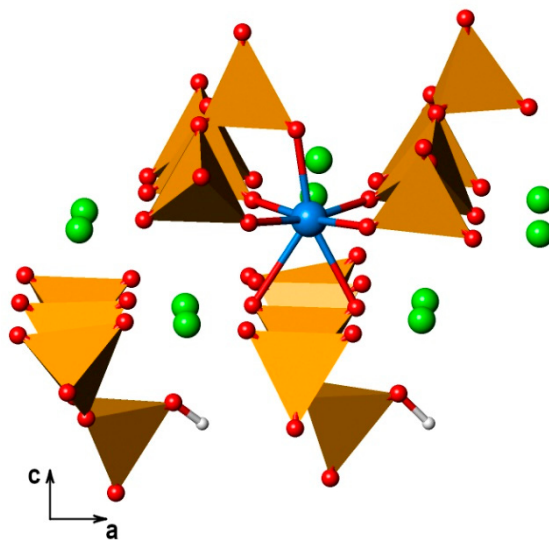

Figure S13. IncO7.

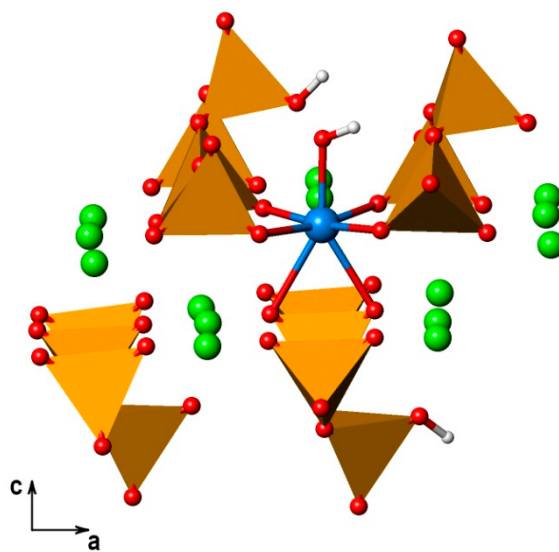

Figure S14. IncW7.
